# Supplementary material
Source: PubMed Central journal article supplement (PMC7788507)
Supplement: jamasurg-e206175-s001.pdf [file jamasurg-e206175-s001.pdf]

## Supplementary Online Content

Seib CD, Suh I, Meng T, et al. Patient factors associated with parathyroidectomy in older adults with primary hyperparathyroidism. Published online January 6, 2021. *JAMA Surg*. doi:10.1001/jamasurg.2020.6175

**eTable 1.** Baseline Characteristics of Medicare Beneficiaries Diagnosed With PHPT (2006-2016) When Cohort Is Restricted to Patients 67 Years and Older

**eTable 2.** Baseline Characteristics of Medicare Beneficiaries Diagnosed With PHPT (2006-2016) When Parathyroidectomy at Any Time After Diagnosis Is Considered Primary Outcome

**eTable 3.** Patient Characteristics Associated With Parathyroidectomy for Beneficiaries With PHPT Based on Multivariable Logistic Regression When Cohort Is Restricted to Patients 67 Years and Older

**eTable 4.** Patient Characteristics Associated With Parathyroidectomy for Beneficiaries With PHPT Based on Multivariable Logistic Regression When Parathyroidectomy at Any Time After Diagnosis Is Considered

**eFigure.** Rate of Parathyroidectomy in Those Diagnosed With PHPT in Each Calendar Year (2006-2016) Among All Patients and Those Who Met Consensus Guideline Criteria for Operative Management

This supplementary material has been provided by the authors to give readers additional information about their work.

**eTable 1. Baseline Characteristics of Medicare Beneficiaries Diagnosed With PHPT (2006-2016) When Cohort Is Restricted to Patients 67 Years and Older**

| Characteristic                                  | Overall Cohort<br>(n = 175,796) |      | Parathyroidectomy<br>(n = 51,684) |      | Non-operatively<br>Managed<br>(n = 124,112) |      |
|-------------------------------------------------|---------------------------------|------|-----------------------------------|------|---------------------------------------------|------|
|                                                 | No.                             | %    | No.                               | %    | No.                                         | %    |
| <b>Gender</b>                                   |                                 |      |                                   |      |                                             |      |
| Male                                            | 37,146                          | 21.1 | 11,168                            | 21.6 | 25,978                                      | 20.9 |
| Female                                          | 138,650                         | 78.9 | 40,516                            | 78.4 | 98,134                                      | 79.1 |
| <b>Age</b>                                      |                                 |      |                                   |      |                                             |      |
| 66 to 75                                        | 93,388                          | 53.1 | 32,932                            | 63.7 | 60,456                                      | 48.7 |
| 76 to 85                                        | 65,425                          | 37.2 | 16,901                            | 32.7 | 48,524                                      | 39.1 |
| 86 and above                                    | 16,983                          | 9.7  | 1,851                             | 3.6  | 15,132                                      | 12.2 |
| <b>Race</b>                                     |                                 |      |                                   |      |                                             |      |
| White                                           | 154,105                         | 87.7 | 46,792                            | 90.5 | 107,313                                     | 86.5 |
| Black                                           | 15,986                          | 9.1  | 3,718                             | 7.2  | 12,268                                      | 9.9  |
| Asian                                           | 1,598                           | 0.9  | 306                               | 0.6  | 1,292                                       | 1.0  |
| Hispanic                                        | 1,794                           | 1.0  | 357                               | 0.7  | 1,437                                       | 1.2  |
| American Native                                 | 381                             | 0.2  | 121                               | 0.2  | 260                                         | 0.2  |
| Other                                           | 1,932                           | 1.1  | 390                               | 0.8  | 1,542                                       | 1.2  |
| <b>ADI<sup>a</sup> Group</b>                    |                                 |      |                                   |      |                                             |      |
| Most advantaged                                 | 44,568                          | 25.4 | 10,422                            | 20.2 | 34,146                                      | 27.5 |
| Slightly advantaged                             | 57,240                          | 32.6 | 16,985                            | 32.9 | 40,255                                      | 32.4 |
| Slightly disadvantaged                          | 54,886                          | 31.2 | 18,100                            | 35.0 | 36,786                                      | 29.6 |
| Most disadvantaged                              | 19,102                          | 10.9 | 6,177                             | 12.0 | 12,925                                      | 10.4 |
| <b>Geography</b>                                |                                 |      |                                   |      |                                             |      |
| Urban                                           | 149,376                         | 85.0 | 42,240                            | 81.7 | 107,136                                     | 86.3 |
| Rural                                           | 26,420                          | 15.0 | 9,444                             | 18.3 | 16,976                                      | 13.7 |
| <b>Region</b>                                   |                                 |      |                                   |      |                                             |      |
| Midwest                                         | 35,901                          | 20.4 | 12,269                            | 23.7 | 23,632                                      | 19.0 |
| Northeast                                       | 43,324                          | 24.6 | 7,889                             | 15.3 | 35,435                                      | 28.6 |
| South                                           | 65,614                          | 37.3 | 21,928                            | 42.4 | 43,686                                      | 35.2 |
| West                                            | 30,957                          | 17.6 | 9,598                             | 18.6 | 21,359                                      | 17.2 |
| <b>Frailty<sup>b</sup></b>                      |                                 |      |                                   |      |                                             |      |
| Robust                                          | 61,784                          | 35.1 | 21,977                            | 42.5 | 39,807                                      | 32.1 |
| Prefrail                                        | 91,092                          | 51.8 | 25,386                            | 49.1 | 65,706                                      | 52.9 |
| Mildly frail                                    | 16,186                          | 9.2  | 3,085                             | 6.0  | 13,101                                      | 10.6 |
| Moderately-to-severely frail                    | 6,734                           | 3.8  | 1,236                             | 2.4  | 5,498                                       | 4.4  |
| <b>Charlson Comorbidity Index Score</b>         |                                 |      |                                   |      |                                             |      |
| 0                                               | 41,754                          | 23.8 | 15,216                            | 29.4 | 26,538                                      | 21.4 |
| 1                                               | 39,477                          | 22.5 | 12,484                            | 24.2 | 26,993                                      | 21.7 |
| ≥2                                              | 94,565                          | 53.8 | 23,984                            | 46.4 | 70,581                                      | 56.9 |
| <b>Consensus Guideline Criteria<sup>c</sup></b> |                                 |      |                                   |      |                                             |      |
| History of stage 3 CKD                          | 15,996                          | 9.1  | 3,258                             | 6.3  | 12,738                                      | 10.3 |
| History of nephrolithiasis                      | 25,032                          | 14.2 | 8,785                             | 17.0 | 16,247                                      | 13.1 |
| History of osteoporosis                         | 97,032                          | 55.2 | 27,467                            | 53.1 | 69,565                                      | 56.1 |
| <b>Endocrinologist Care</b>                     | 82,874                          | 47.1 | 28,137                            | 54.4 | 54,737                                      | 44.1 |

Abbreviations: ADI, area deprivation index; CKD, chronic kidney disease; OR, odds ratio; CI, confidence interval.

<sup>a</sup> Area Deprivation Index determined based on mailing zip code of beneficiary according to the Neighborhood Atlas.<sup>15</sup>

<sup>b</sup> Frailty category determined based on the validated Claims-based frailty index.<sup>16</sup>

**eTable 2. Baseline Characteristics of Medicare Beneficiaries Diagnosed With PHPT (2006-2016) When Parathyroidectomy at Any Time After Diagnosis Is Considered Primary Outcome**

| Characteristic                                  | Overall Cohort<br>(n = 210,206) |      | Parathyroidectomy<br>at any time during<br>follow up<br>(n = 75,225) |      | Non-operatively<br>Managed<br>(n = 134,981) |      |
|-------------------------------------------------|---------------------------------|------|----------------------------------------------------------------------|------|---------------------------------------------|------|
|                                                 | No.                             | %    | No.                                                                  | %    | No.                                         | %    |
| <b>Gender</b>                                   |                                 |      |                                                                      |      |                                             |      |
| Male                                            | 44,569                          | 21.2 | 16,034                                                               | 21.3 | 28,535                                      | 21.1 |
| Female                                          | 165,637                         | 78.8 | 59,191                                                               | 78.7 | 106,446                                     | 78.9 |
| <b>Age</b>                                      |                                 |      |                                                                      |      |                                             |      |
| 66 to 75                                        | 117,960                         | 56.1 | 50,632                                                               | 67.3 | 67,328                                      | 49.9 |
| 76 to 85                                        | 73,491                          | 35.0 | 22,272                                                               | 29.6 | 51,219                                      | 37.9 |
| 86 and above                                    | 18,755                          | 8.9  | 2,321                                                                | 3.1  | 16,434                                      | 12.2 |
| <b>Race</b>                                     |                                 |      |                                                                      |      |                                             |      |
| White                                           | 183,433                         | 87.3 | 67,457                                                               | 89.7 | 115,976                                     | 85.9 |
| Black                                           | 19,797                          | 9.4  | 5,929                                                                | 7.9  | 13,868                                      | 10.3 |
| Asian                                           | 1,953                           | 0.9  | 473                                                                  | 0.6  | 1,480                                       | 1.1  |
| Hispanic                                        | 2,280                           | 1.1  | 564                                                                  | 0.7  | 1,716                                       | 1.3  |
| American Native                                 | 453                             | 0.2  | 180                                                                  | 0.2  | 273                                         | 0.2  |
| Other                                           | 2,290                           | 1.1  | 622                                                                  | 0.8  | 1,668                                       | 1.2% |
| <b>ADI<sup>a</sup> Group</b>                    |                                 |      |                                                                      |      |                                             |      |
| Most advantaged                                 | 52,899                          | 25.2 | 15,668                                                               | 20.8 | 37,231                                      | 27.6 |
| Slightly advantaged                             | 68,471                          | 32.6 | 24,785                                                               | 32.9 | 43,686                                      | 32.4 |
| Slightly disadvantaged                          | 65,887                          | 31.3 | 25,988                                                               | 34.5 | 39,899                                      | 29.6 |
| Most disadvantaged                              | 22,949                          | 10.9 | 8,784                                                                | 11.7 | 14,165                                      | 10.5 |
| <b>Geography</b>                                |                                 |      |                                                                      |      |                                             |      |
| Urban                                           | 178,718                         | 85.0 | 61,986                                                               | 82.4 | 116,732                                     | 86.5 |
| Rural                                           | 31,488                          | 15.0 | 13,239                                                               | 17.6 | 18,249                                      | 13.5 |
| <b>Region</b>                                   |                                 |      |                                                                      |      |                                             |      |
| Midwest                                         | 43,340                          | 20.6 | 17,651                                                               | 23.5 | 25,689                                      | 19.0 |
| Northeast                                       | 51,574                          | 24.5 | 12,368                                                               | 16.4 | 39,206                                      | 29.1 |
| South                                           | 78,235                          | 37.2 | 31,194                                                               | 41.5 | 47,041                                      | 34.9 |
| West                                            | 37,057                          | 17.6 | 14,012                                                               | 18.6 | 23,045                                      | 17.1 |
| <b>Frailty<sup>b</sup></b>                      |                                 |      |                                                                      |      |                                             |      |
| Robust                                          | 76,954                          | 36.6 | 33,249                                                               | 44.2 | 43,705                                      | 32.4 |
| Prefrail                                        | 107,248                         | 51.0 | 36,220                                                               | 48.1 | 71,028                                      | 52.6 |
| Mildly frail                                    | 18,316                          | 8.7  | 4,082                                                                | 5.4  | 14,234                                      | 10.5 |
| Moderately-to-severely frail                    | 7,688                           | 3.7  | 1,674                                                                | 2.2  | 6,014                                       | 4.5  |
| <b>Charlson Comorbidity Index Score</b>         |                                 |      |                                                                      |      |                                             |      |
| 0                                               | 51,534                          | 24.5 | 22,824                                                               | 30.3 | 28,710                                      | 21.3 |
| 1                                               | 47,758                          | 22.7 | 18,334                                                               | 24.4 | 29,424                                      | 21.8 |
| ≥2                                              | 110,914                         | 52.8 | 34,067                                                               | 45.3 | 76,847                                      | 56.9 |
| <b>Consensus Guideline Criteria<sup>c</sup></b> |                                 |      |                                                                      |      |                                             |      |
| History of stage 3 CKD                          | 17,566                          | 8.4  | 4,262                                                                | 5.7  | 13,304                                      | 9.9  |
| History of nephrolithiasis                      | 28,239                          | 13.4 | 11,793                                                               | 15.7 | 16,446                                      | 12.2 |
| History of osteoporosis                         | 110,314                         | 52.5 | 37,841                                                               | 50.3 | 72,473                                      | 53.7 |
| <b>Endocrinologist Care</b>                     | 98,660                          | 46.9 | 41,325                                                               | 54.9 | 57,335                                      | 42.5 |

Abbreviations: ADI, area deprivation index; CKD, chronic kidney disease.

<sup>a</sup> Area Deprivation Index determined based on mailing zip code of beneficiary according to the Neighborhood Atlas.<sup>15</sup>

<sup>b</sup> Frailty category determined based on the validated Claims-based frailty index.<sup>18</sup>

**eTable 3. Patient Characteristics Associated With Parathyroidectomy for Beneficiaries With PHPT Based on Multivariable Logistic Regression When Cohort Is Restricted to Patients 67 Years and Older**

| Characteristic                      | Adjusted OR | 95% CI |      |
|-------------------------------------|-------------|--------|------|
| <b>Gender</b>                       |             |        |      |
| Female                              | Ref         | --     | --   |
| Male                                | 1.00        | 0.97   | 1.02 |
| <b>Age</b>                          |             |        |      |
| 66 to 75                            | Ref         | --     | --   |
| 76 to 85                            | 0.69        | 0.68   | 0.71 |
| 86 and above                        | 0.27        | 0.26   | 0.29 |
| <b>Race</b>                         |             |        |      |
| White                               | Ref         | --     | --   |
| Black                               | 0.66        | 0.64   | 0.69 |
| Asian                               | 0.64        | 0.56   | 0.72 |
| Hispanic                            | 0.64        | 0.57   | 0.73 |
| American Native                     | 0.94        | 0.75   | 1.17 |
| Other                               | 0.60        | 0.53   | 0.67 |
| <b>ADI<sup>a</sup> Group</b>        |             |        |      |
| Most advantaged                     | Ref         | --     | --   |
| Slightly advantaged                 | 1.39        | 1.35   | 1.43 |
| Slightly disadvantaged              | 1.62        | 1.57   | 1.67 |
| Most disadvantaged                  | 1.66        | 1.60   | 1.73 |
| <b>Geography</b>                    |             |        |      |
| Urban                               | Ref         | --     | --   |
| Rural                               | 1.18        | 1.15   | 1.22 |
| <b>Frailty<sup>b</sup></b>          |             |        |      |
| Robust                              | Ref         | --     | --   |
| Prefrail                            | 0.84        | 0.82   | 0.86 |
| Mildly frail                        | 0.61        | 0.58   | 0.64 |
| Moderately-to-severely frail        | 0.59        | 0.55   | 0.63 |
| <b>Charlson Score</b>               |             |        |      |
| 0                                   | Ref         | --     | --   |
| 1                                   | 0.88        | 0.85   | 0.91 |
| ≥2                                  | 0.77        | 0.75   | 0.79 |
| <b>Consensus Guideline Criteria</b> |             |        |      |
| History of nephrolithiasis          | 1.40        | 1.36   | 1.44 |
| History of osteoporosis             | 0.99        | 0.97   | 1.01 |
| History of stage 3 CKD              | 0.73        | 0.70   | 0.76 |
| <b>Endocrinologist Care</b>         | 1.43        | 1.40   | 1.46 |

Abbreviations: ADI, area deprivation index; CKD, chronic kidney disease; OR, odds ratio; CI, confidence interval.

<sup>a</sup> Area Deprivation Index determined based on mailing zip code of beneficiary according to the Neighborhood Atlas.<sup>15</sup>

<sup>b</sup> Frailty category determined based on the validated Claims-based frailty index.<sup>18</sup>

**eTable 4. Patient Characteristics Associated With Parathyroidectomy for Beneficiaries With PHPT Based on Multivariable Logistic Regression When Parathyroidectomy at Any Time After Diagnosis Is Considered**

| Characteristic                      | Adjusted OR | 95% CI |      |
|-------------------------------------|-------------|--------|------|
| <b>Gender</b>                       |             |        |      |
| Female                              | Ref         | --     | --   |
| Male                                | 0.96        | 0.94   | 0.99 |
| <b>Age</b>                          |             |        |      |
| 66 to 75                            | Ref         | --     | --   |
| 76 to 85                            | 0.63        | 0.62   | 0.64 |
| 86 and above                        | 0.23        | 0.22   | 0.24 |
| <b>Race</b>                         |             |        |      |
| White                               | Ref         | --     | --   |
| Black                               | 0.70        | 0.68   | 0.72 |
| Asian                               | 0.63        | 0.57   | 0.70 |
| Hispanic                            | 0.64        | 0.58   | 0.71 |
| American Native                     | 1.01        | 0.83   | 1.23 |
| Other                               | 0.66        | 0.60   | 0.72 |
| <b>ADI<sup>a</sup> Group</b>        |             |        |      |
| Most advantaged                     | Ref         | --     | --   |
| Slightly advantaged                 | 1.36        | 1.33   | 1.40 |
| Slightly disadvantaged              | 1.57        | 1.53   | 1.61 |
| Most disadvantaged                  | 1.59        | 1.53   | 1.65 |
| <b>Geography</b>                    |             |        |      |
| Urban                               | Ref         | --     | --   |
| Rural                               | 1.16        | 1.13   | 1.19 |
| <b>Frailty<sup>b</sup></b>          |             |        |      |
| Robust                              | Ref         | --     | --   |
| Prefrail                            | 0.83        | 0.81   | 0.84 |
| Mildly frail                        | 0.57        | 0.55   | 0.59 |
| Moderately-to-severely frail        | 0.56        | 0.53   | 0.59 |
| <b>Charlson Score</b>               |             |        |      |
| 0                                   | Ref         | --     | --   |
| 1                                   | 0.87        | 0.84   | 0.89 |
| ≥2                                  | 0.75        | 0.73   | 0.77 |
| <b>Consensus Guideline Criteria</b> |             |        |      |
| History of nephrolithiasis          | 1.40        | 1.36   | 1.44 |
| History of osteoporosis             | 0.97        | 0.95   | 0.99 |
| History of stage 3 CKD              | 0.70        | 0.68   | 0.73 |
| <b>Endocrinologist Care</b>         | 1.57        | 1.54   | 1.60 |

Abbreviations: ADI, area deprivation index; CKD, chronic kidney disease; OR, odds ratio; CI, confidence interval.

<sup>a</sup> Area Deprivation Index determined based on mailing zip code of beneficiary according to the Neighborhood Atlas.<sup>15</sup>

<sup>b</sup> Frailty category determined based on the validated Claims-based frailty index.<sup>18</sup>

**eFigure. Rate of Parathyroidectomy in Those Diagnosed With PHPT in Each Calendar Year (2006-2016) Among All Patients and Those Who Met Consensus Guideline Criteria for Operative Management**

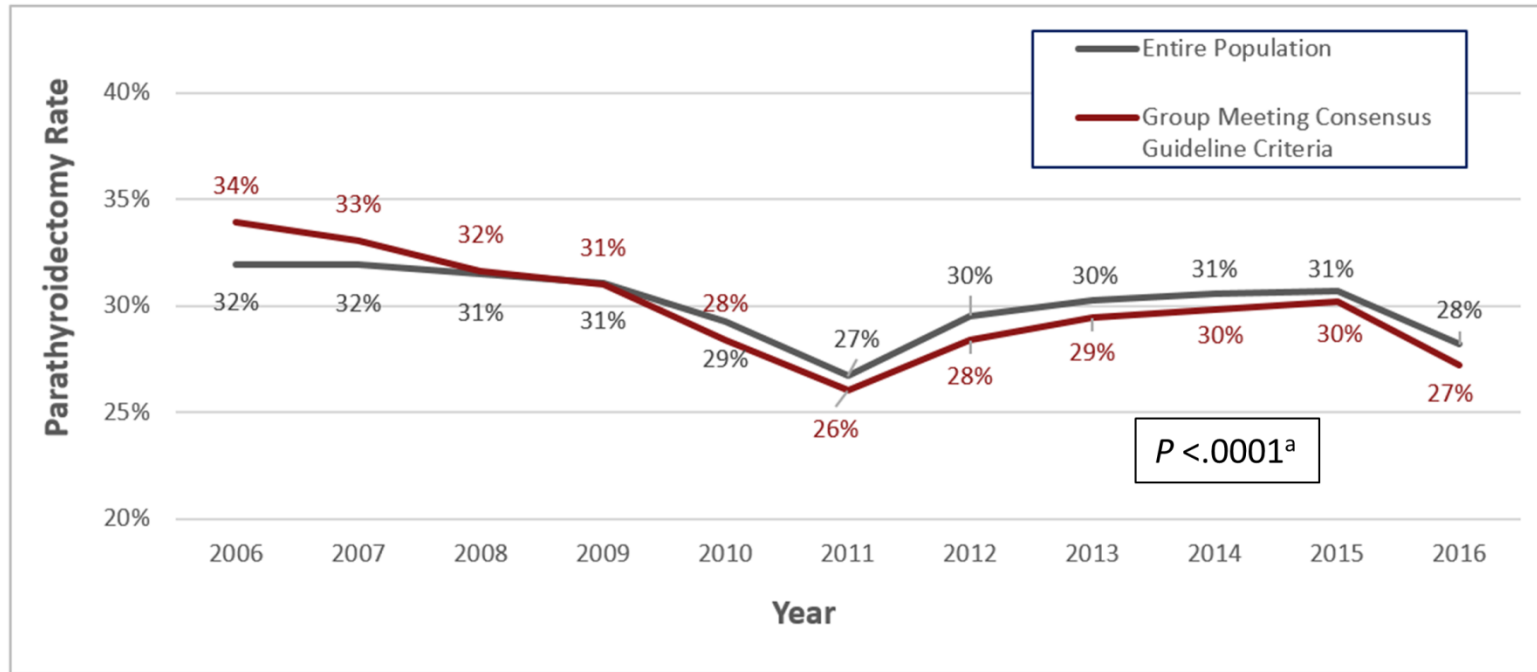

\* Meeting consensus guideline criteria for parathyroidectomy defined based on a documented diagnosis of osteoporosis, nephrolithiasis, or stage 3 chronic kidney disease.

<sup>a</sup> P-value reported is for Cochran-Armitage trend test among the entire population diagnosed with PHPT and among the subgroup of patients who met consensus guideline criteria.
